# Supplementary material for: VfoldCPX Server: Predicting RNA-RNA Complex Structure and Stability
Source: PubMed Central journal article supplement (PMC5033388; doi:10.1371/journal.pone.0163454), 2016-09-22
Supplement: pone.0163454.s001.pdf [file pone.0163454.s001.pdf]

## Supplementary Information:

### VfoldCPX server: Predicting RNA-RNA complex structure and stability

Xiaojun XU, and Shi-Jie CHEN

Department of Physics, Department of Biochemistry, and Informatics Institute  
University of Missouri, Columbia, MO 65211

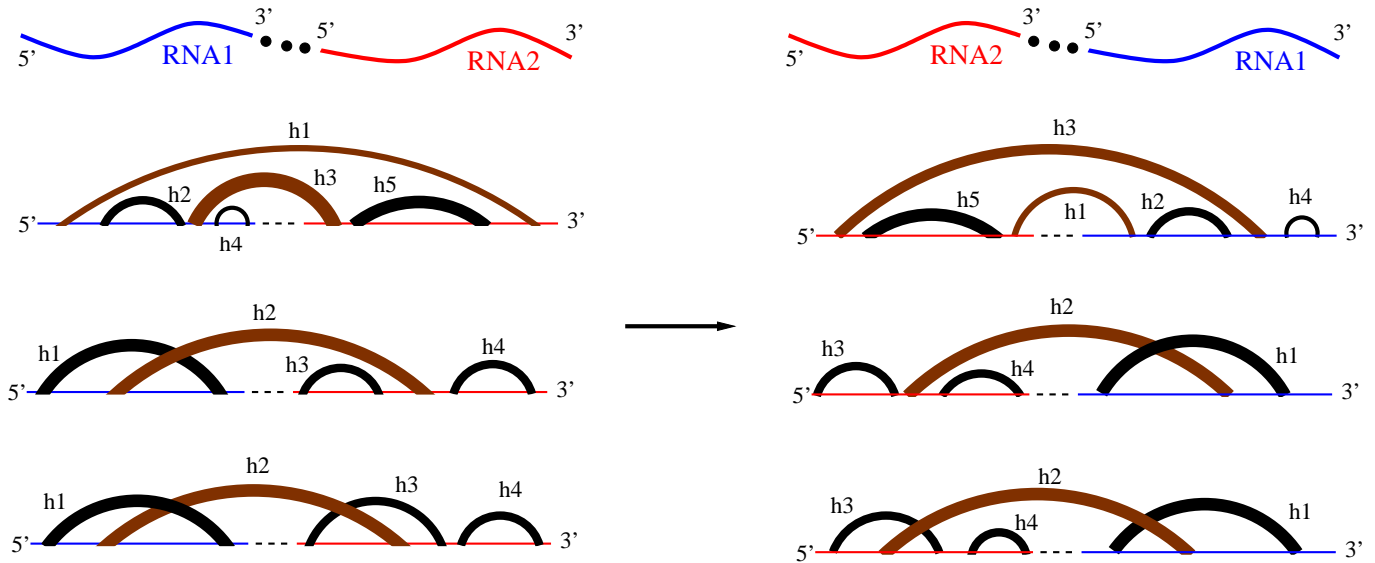

Figure S1: Two different orders for connecting two RNA sequences into one RNA system by a three-nucleotide phantom linker. The change of the order does not change the structure types for the three structure ensembles in the VfoldCPX calculations.

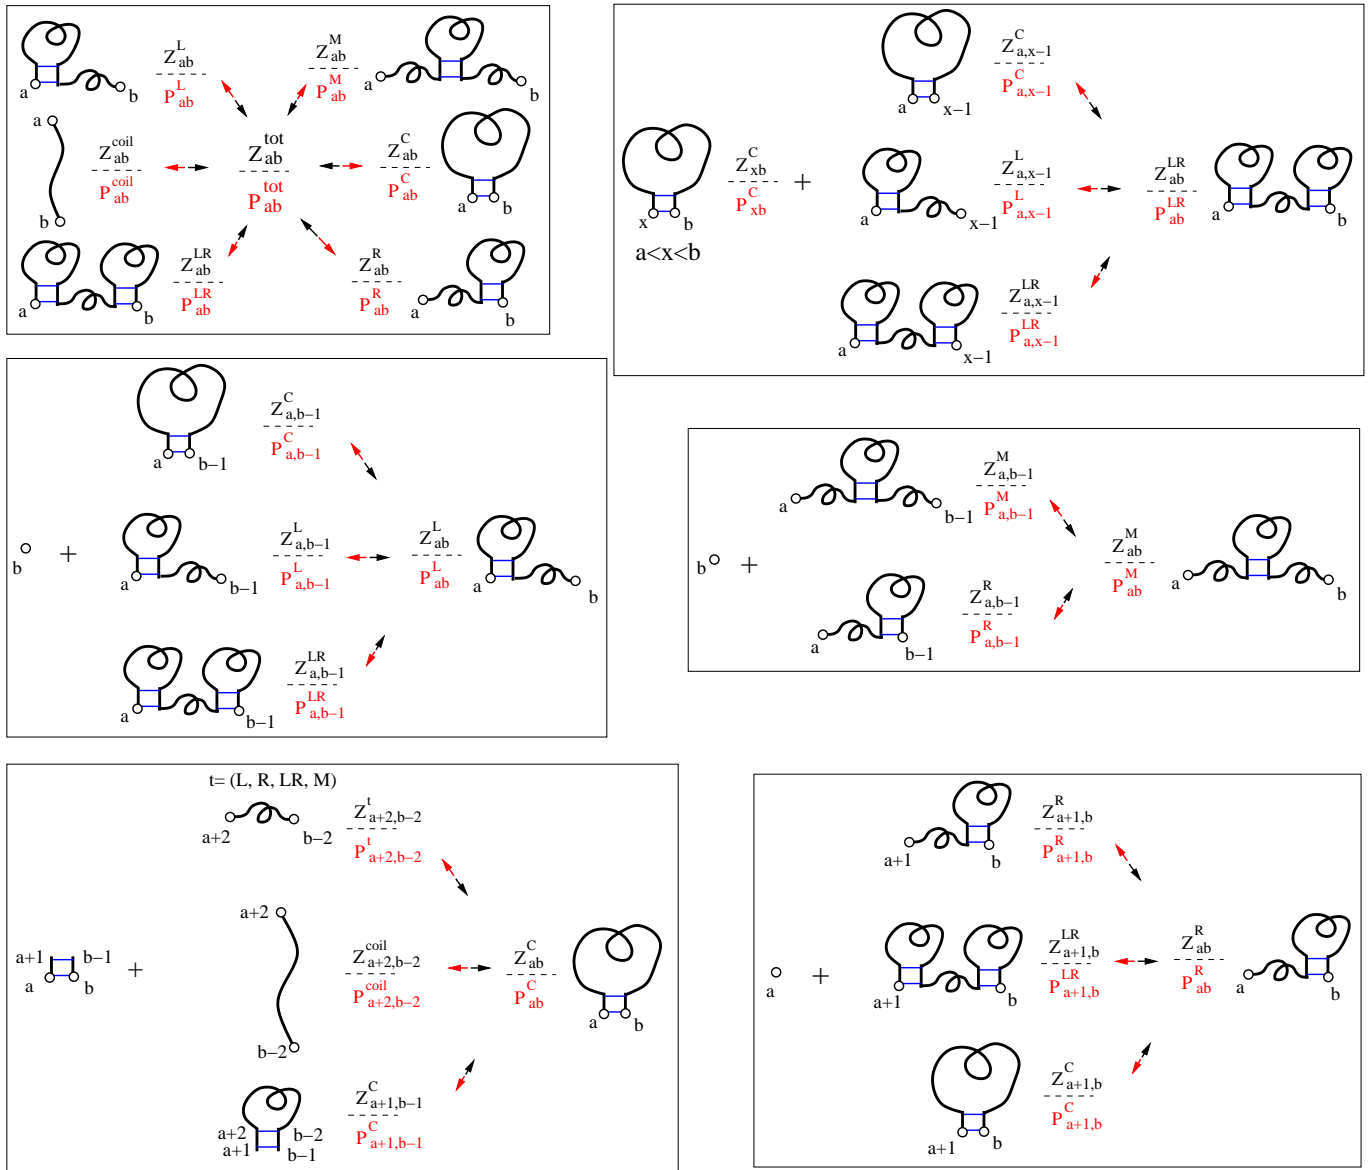

Figure S2: For a given segment  $[a,b]$ , we classify six types of conformations. The *coil* state is the one without any base pairs. The type *C* is the ensemble of conformations with  $(a,b)$  base paired. The type *L/R* is the ensemble of conformations with nucleotide  $a/b$  base paired with other nucleotides (except  $b/a$ ). The type *LR* is the ensemble of conformations with both nucleotide  $a$  and  $b$  forming base paired with other nucleotides but not with each other. And the type *M* is the ensemble of conformations containing at least two base pairs, but both  $a$  and  $b$  are unpaired. The total partition function is the sum over all the six types of conformations ( $t = coil, C, L, R, LR, M$ ):  $Z_{ab}^{tot} = \sum_t Z_{ab}^t$ . The backtracking process starts from  $P_{1N}^{tot} = 1.0$  and proceeds differently for each type of conformational ensemble. As an example of the total conformational ensemble, the backtracking proceeds through  $P_{ab}^t = (Z_{ab}^t/Z_{ab}^{tot}) \cdot P_{ab}^{tot}$ . Here,  $N$  is the RNA length and  $Z_{ab}^{coil} = 1.0$ .

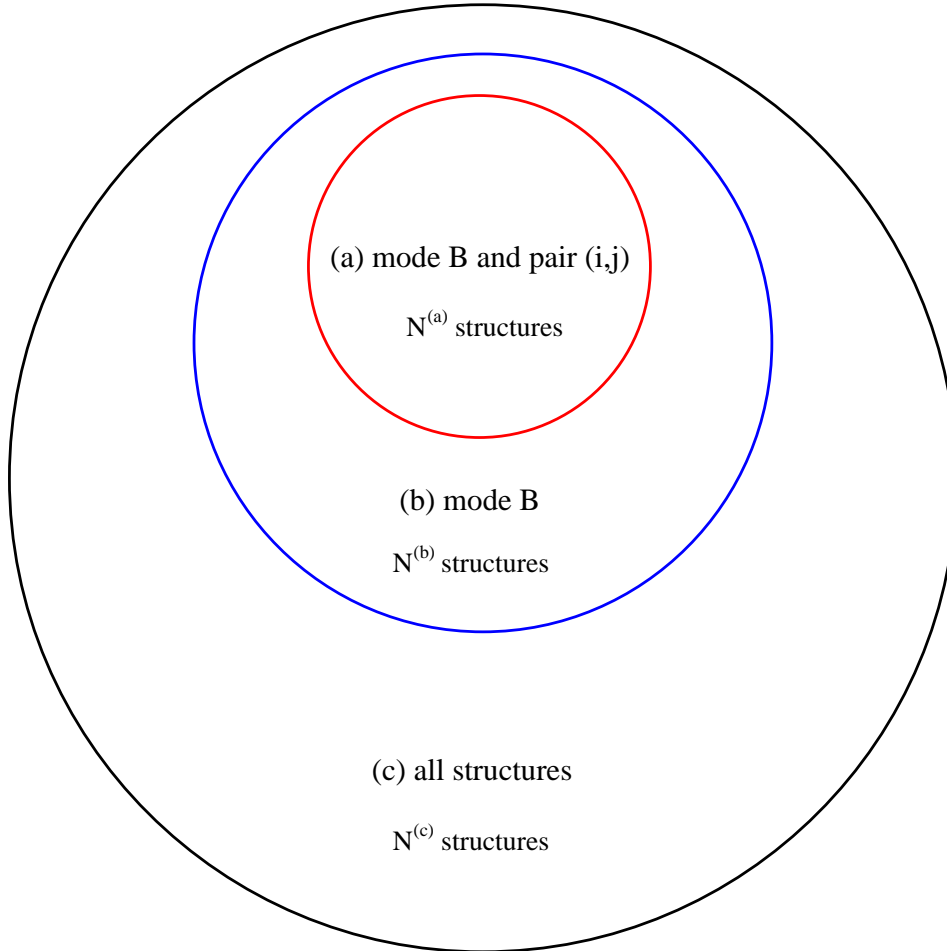

Figure S3: Structural ensembles and (conditional) partition functions. (a) The ensemble of totally  $N^{(a)}$  structures with the binding mode "B" and the  $(i, j)$  base pair. The (conditional) partition function  $Z_{ij}^B = \sum_{s=1}^{N^{(a)}} e^{-G(s)/k_B T}$ . Here,  $G(s)$  is the free energy of structure  $s$ .  $k_B$  is the Boltzmann constant and  $T$  is the temperature. (b) The ensemble of  $N^{(a)}$  structures of the binding mode "B", including  $N^{(a)}$  and  $(N^{(b)} - N^{(a)})$  structures with and without the  $(i, j)$  base pair, respectively.  $Z^B = \sum_{s=1}^{N^{(b)}} e^{-G(s)/k_B T}$ . (c) The ensemble of all the  $N^{(c)}$  structures with all the possible binding modes.  $Z^{\text{tot}} = \sum_{s=1}^{N^{(c)}} e^{-G(s)/k_B T}$  gives the total partition function.  $P^B = Z^B/Z^{\text{tot}}$  denotes the population of all the structures with the binding mode "B".  $P_{ij}^B = Z_{ij}^B/Z^{\text{tot}}$  gives the population of all the structures with the binding mode "B" and the  $(i, j)$  base pair.

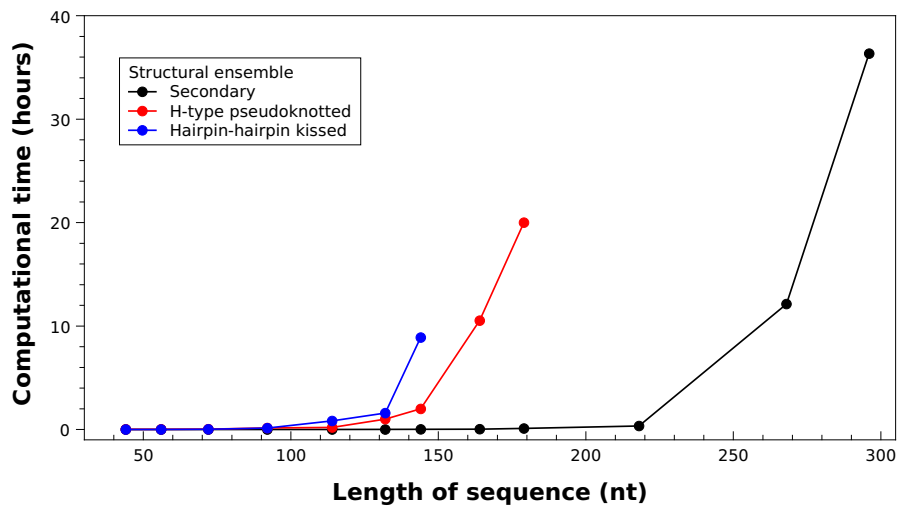

Figure S4: Computational time of VfoldCPX for the ensemble of the secondary structures only (in black), ensemble including H-type pseudoknotted structures (in red), and the ensemble including hairpin-hairpin kissing structures (in blue). The computer resource used in the test is HP pavilion HPE with the Intel (R) Core (TM) i7-2600 (3.40 GHz) processor.
